# Supplementary material for: A meteorological overview of the ORACLES (ObseRvations of Aerosols above CLouds and their intEractionS) campaign over the southeast Atlantic during 2016–2018
Source: Copernicus journal article supplement (doi:10.5194/acp-2021-274), 2021-04-01
Supplement: Supplementary file 1 [file acp-2021-274-supplement.pdf]

## Supplementary materials:

# **A meteorological overview of the ORACLES (ObseRvations of Aerosols above CLouds and their intEractionS) campaign over the southeast Atlantic during 2016-2018**

5

Ju-Mee Ryoo<sup>1,2</sup>, Leonhard Pfister<sup>1</sup>, Rei Ueyama<sup>1</sup>, Paquita Zuidema<sup>3</sup>, Robert Wood<sup>4</sup>, Ian Chang<sup>5</sup>,  
Jens Redemann<sup>5</sup>

<sup>1</sup> Earth Science Division, NASA Ames Research Center, Moffett Field, CA, USA

10 <sup>2</sup> Science and Technology Corporation, Moffett Field, CA, USA

<sup>3</sup> Department of Atmospheric Sciences, Rosenstiel School of Marine and Atmospheric Science, University of Miami, Miami, FL, USA

<sup>4</sup> Department of Atmospheric Sciences, University of Washington, Seattle, WA, USA

<sup>5</sup> University of Oklahoma, School of Meteorology, Norman, OK, USA

15

*Correspondence to:* Ju-Mee Ryoo (ju-mee.ryoo@nasa.gov)

20

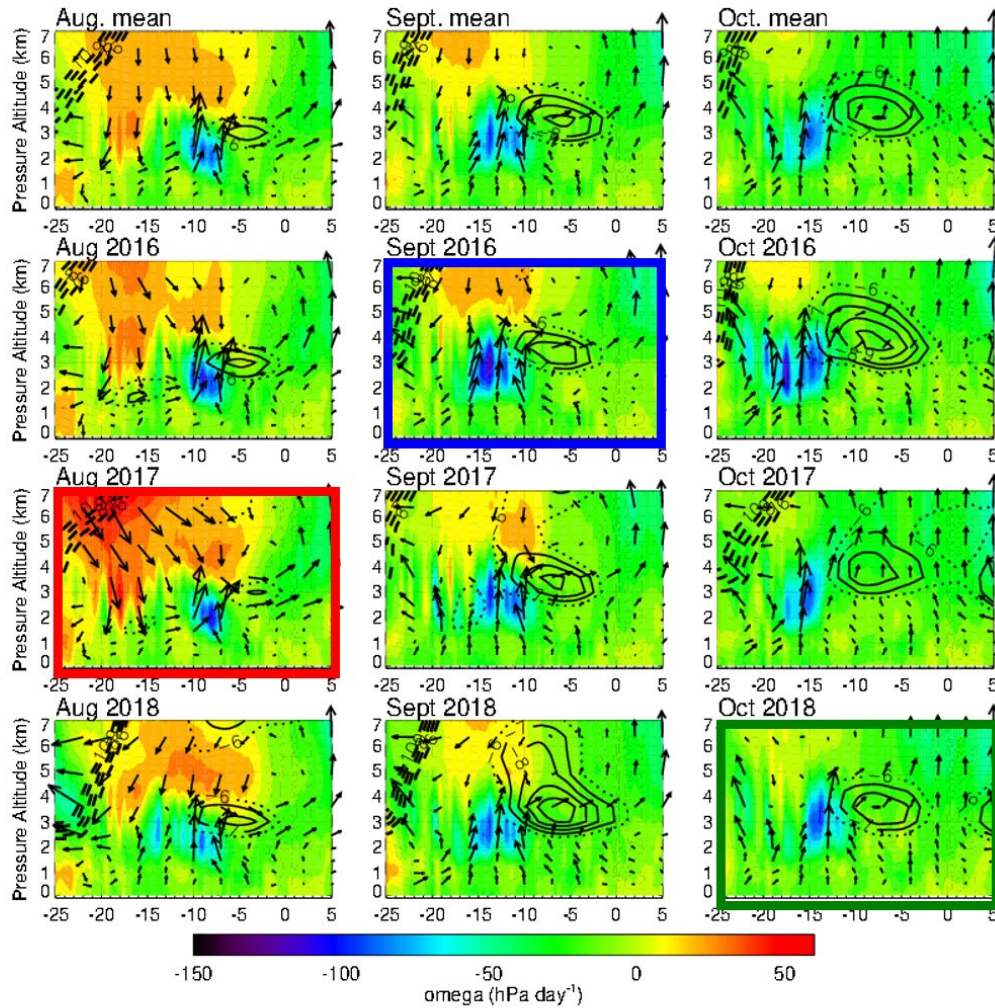

Figure 1S. The latitude-height cross-section of vertical motion ( $\omega$ , shading,  $\text{hPa day}^{-1}$ ) overlaid by wind vector (meridional wind and  $\omega$  ( $v, -\omega$ )) and zonal wind (black contour,  $\text{m s}^{-1}$ ) averaged over 12-24° E during August, September, and October for 19 years mean (2000–2018, top) and 3 years of the ORACLES deployment (2016, 2017, and 2018). The color box around the plot represents the deployment month.

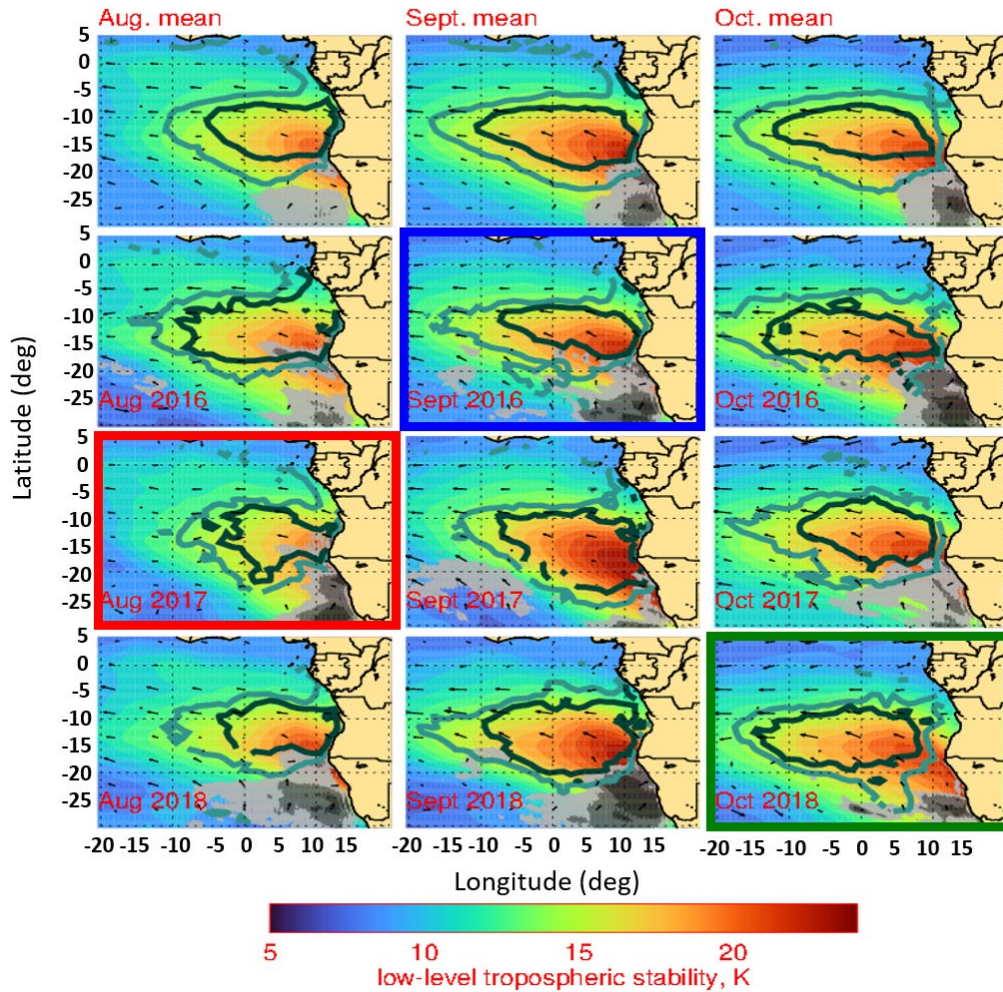

30 **Figure 2S. Map of LTS (shading, color) and low-level cloud fraction (low-CF; cloud-top below 2.5 km) (0.8 and 0.9) overlaid by subsidence (omega at 800hPa, 50, 65, 80 hPa day<sup>-1</sup> from the light gray) and horizontal wind vector (black) at 800 hPa for August, September, and October. Top row: climatology computed over 2003-2018. Second through the fourth row: monthly averages for August through October 2016, 2017, and 2018, respectively. The colored boxes around the plots represent the years of ORACLES deployments.**

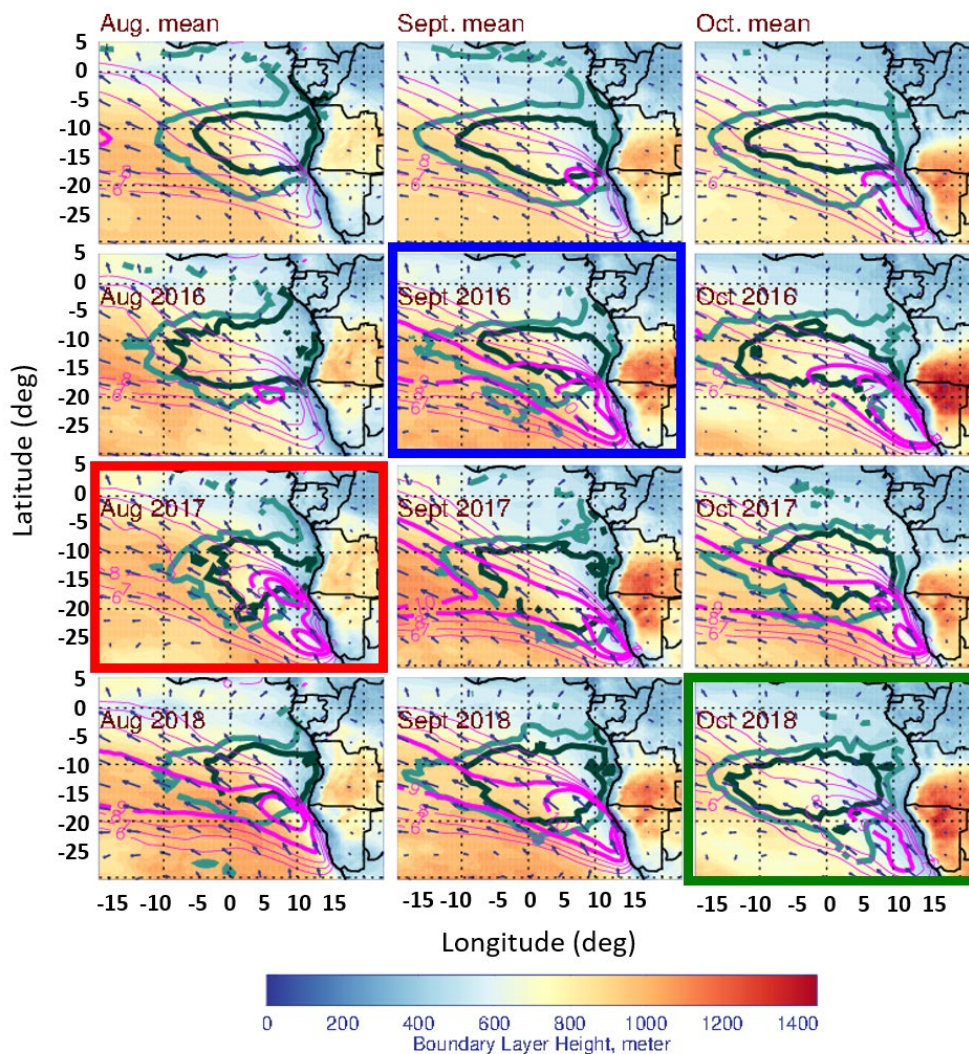

**Figure. 3S.** Monthly mean mixed-layer BLH (shading, color), the horizontal wind (vector; magnitude in magenta contours) at 925 hPa overlaid by low-CF for the climatological mean and 3 years of the ORACLES deployment (August, September, and October, 2016–2018). The colored boxes around the plots represent the years of ORACLES deployments.

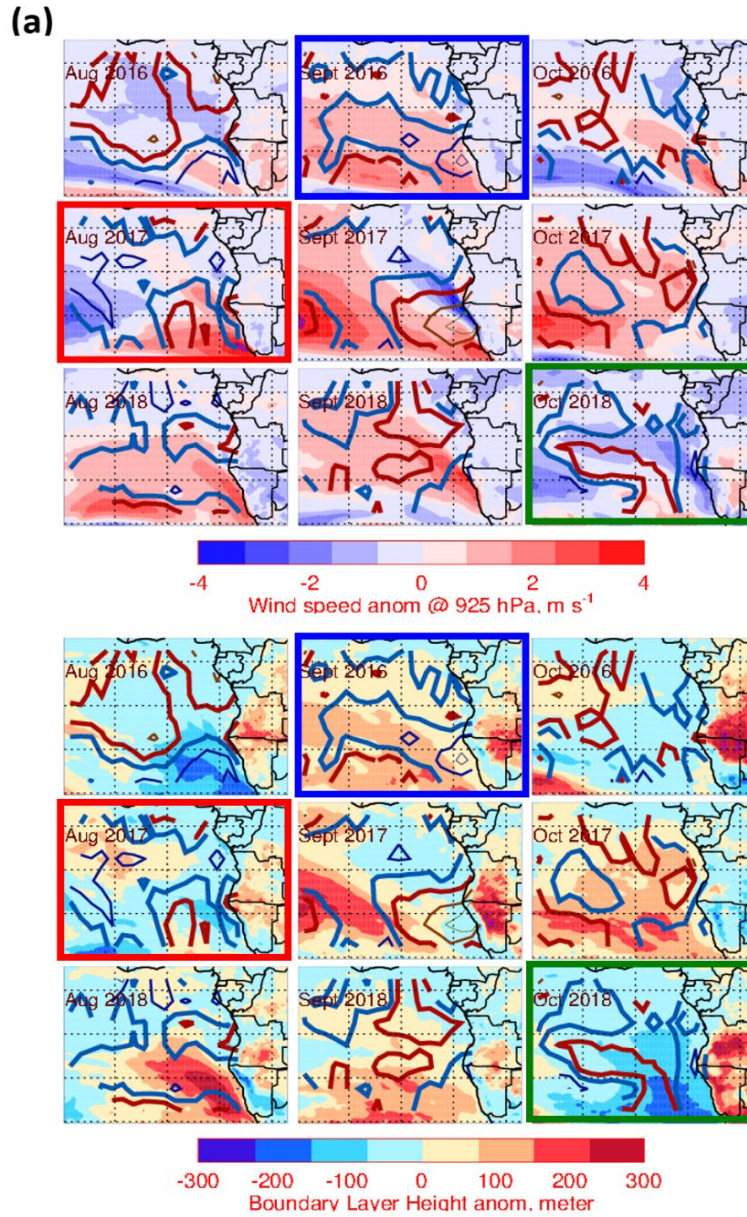

Figure 4S. (a) Map of monthly mean wind speed at 925 hPa anomaly (color shading,  $\text{m s}^{-1}$ ) overlaid by low-CF anomaly (contours: blue (-0.02, -0.07, -0.12), and dark red (+0.02, +0.07, +0.12), %). (b) Map of monthly mean BLH anomaly (color shading, m) overlaid by low-CF anomaly (contours: blue (-0.02, -0.07, -0.12), and dark red (+0.02, +0.07, +0.12), %). The colored boxes around the plots represent the years of ORACLES deployments.

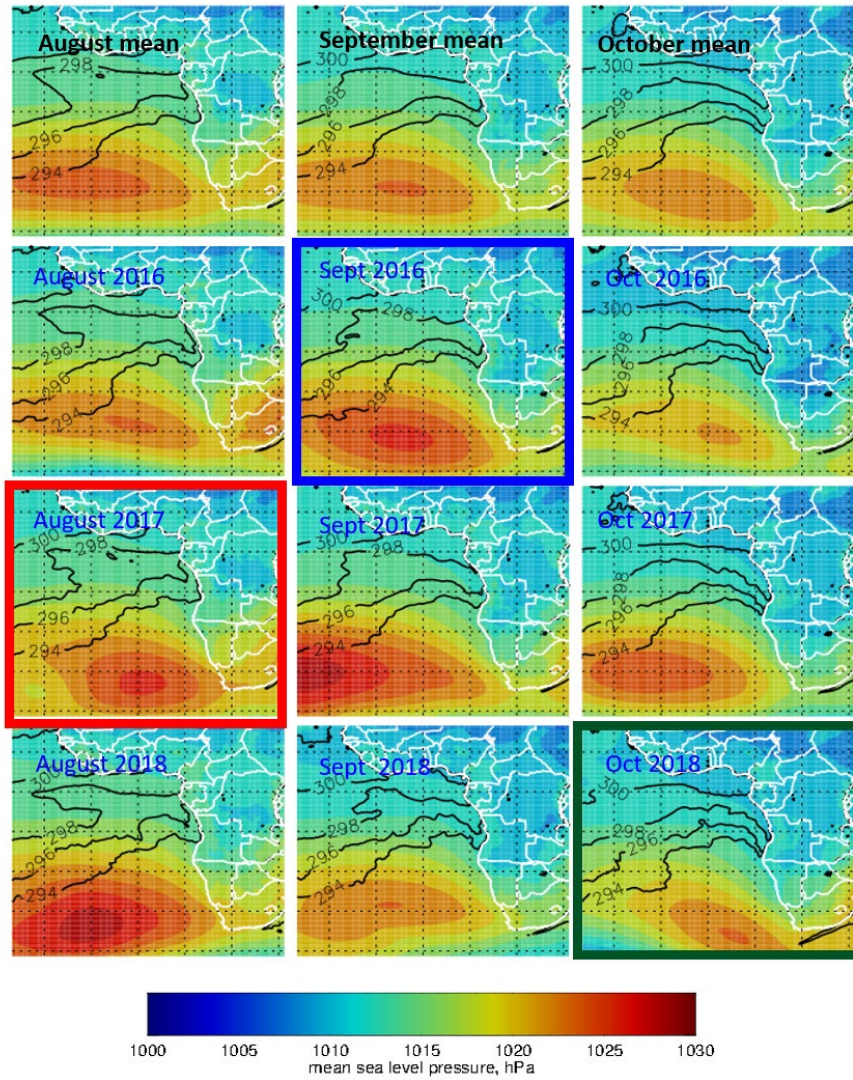

Figure 5S. Mean SLP overlaid with SST for the climatology (2000-2018) and the August, September, and  
 50 October for 2016-2018. The colored boxes around the plots represent the years of ORACLES deployments.

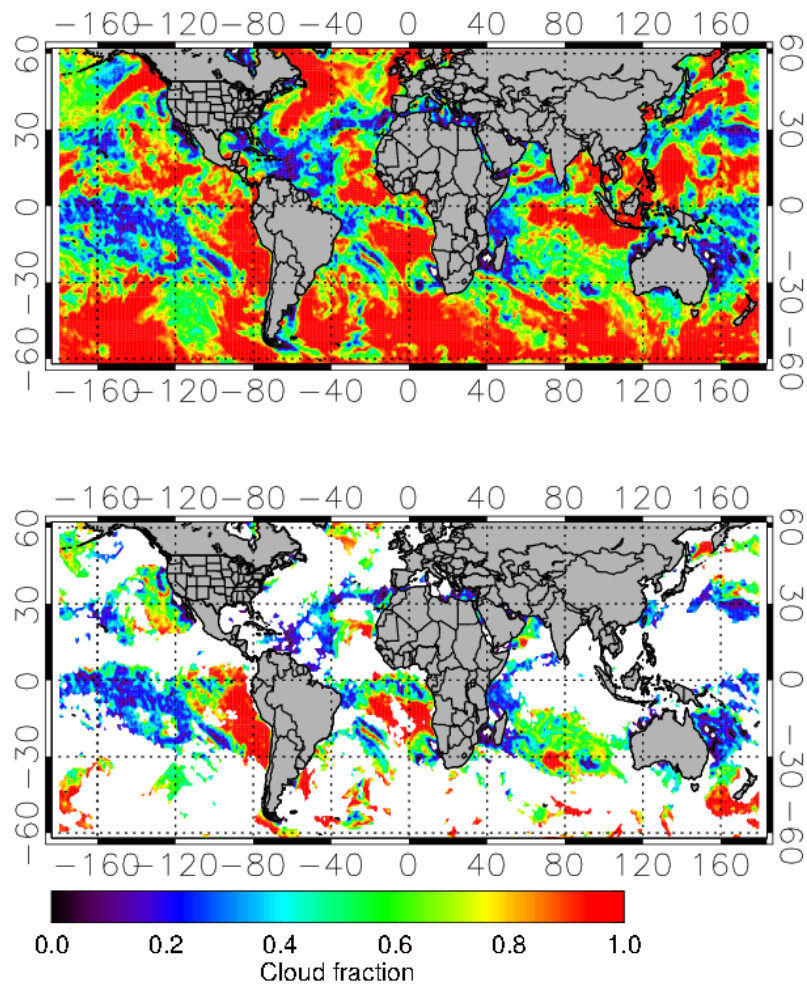

Figure 6S. Global map of daily (top) total cloud fraction and (bottom) low-CF (cloud top height is less than  
 55 2.5 km) on 24 September 2016.
